# Supplementary material for: Framework for assessing lateral flows and fluxes during floods in aconduit-flow dominated karst system using an inverse diffusivemodel
Source: Copernicus journal article supplement (doi:10.5194/hess-2016-565), 2016-11-11
Supplement: Supplementary file 1 [file hess-2016-565-supplement.pdf]

## Appendix A: Notations

**Table A1.** Notations

| Symbols                                | Units                                                 | Definitions                                                                 |
|----------------------------------------|-------------------------------------------------------|-----------------------------------------------------------------------------|
| *                                      | –                                                     | represents the mathematical convolution function                            |
| $C_M$                                  | $[\text{m} \cdot \text{s}^{-1}]$                      | parameter controlling the solute mass flux celerity                         |
| $C_Q$                                  | $[\text{m} \cdot \text{s}^{-1}]$                      | flood wave celerity                                                         |
| $D_M$                                  | $[\text{m}^2 \cdot \text{s}^{-1}]$                    | parameter controlling the solute mass flux diffusivity                      |
| $D_Q$                                  | $[\text{m}^2 \cdot \text{s}^{-1}]$                    | flood wave diffusivity                                                      |
| $(K_Q, K_M)$                           | –                                                     | Hayami kernel function for water flow and mass flux modelling, respectively |
| $m$                                    | $[\text{kg} \cdot \text{s}^{-1} \cdot \text{m}^{-1}]$ | lateral mass flux per length unit                                           |
| $M$                                    | $[\text{kg} \cdot \text{s}^{-1}]$                     | mass flux                                                                   |
| $(M_{I,base}, M_{I,flood}, M_{I,tot})$ | $[\text{kg} \cdot \text{s}^{-1}]$                     | upstream base, flood and total mass flux, respectively                      |
| $(M_{O,base}, M_{O,flood}, M_{O,tot})$ | $[\text{kg} \cdot \text{s}^{-1}]$                     | downstream base, flood and total mass flux, respectively                    |
| $(M_{A,base}, M_{A,flood}, M_{A,tot})$ | $[\text{kg} \cdot \text{s}^{-1}]$                     | lateral base, flood and total mass flux exchanges, respectively             |
| $q$                                    | $[\text{m}^2 \cdot \text{s}^{-1}]$                    | lateral flow per length unit                                                |
| $Q$                                    | $[\text{m}^3 \cdot \text{s}^{-1}]$                    | discharge                                                                   |
| $(Q_{I,base}, Q_{I,flood}, Q_{I,tot})$ | $[\text{m}^3 \cdot \text{s}^{-1}]$                    | upstream base, flood and total flow, respectively                           |
| $(Q_{O,base}, Q_{O,flood}, Q_{O,tot})$ | $[\text{m}^3 \cdot \text{s}^{-1}]$                    | downstream base, flood and total flow, respectively                         |
| $(Q_{A,base}, Q_{A,flood}, Q_{A,tot})$ | $[\text{m}^3 \cdot \text{s}^{-1}]$                    | lateral base, flood and total flow exchanges, respectively                  |
| $(R1, R2)$                             | –                                                     | reach 1 (s1 to s2) and reach 2 (s2 to s3), respectively                     |
| $(s1, s2, s3)$                         | –                                                     | monitoring station 1, 2 and 3, respectively                                 |
| $(S_{I,base}, S_{I,flood}, S_{I,tot})$ | $[\text{g} \cdot \text{l}^{-1}]$                      | upstream solute base, flood and total concentrations, respectively          |
| $(S_{O,base}, S_{O,flood}, S_{O,tot})$ | $[\text{g} \cdot \text{l}^{-1}]$                      | downstream solute base, flood and total concentrations, respectively        |
| $(S_{A,base}, S_{A,flood}, S_{A,tot})$ | $[\text{g} \cdot \text{l}^{-1}]$                      | lateral solute base, flood and total concentrations, respectively           |
| $t$                                    | $[\text{s}]$                                          | time                                                                        |
| $U$                                    | –                                                     | percentage of the unsaturated conduit length along R2                       |
| $x$                                    | $[\text{m}]$                                          | downstream distance                                                         |
